# Supplementary material for: Effects of Urbanization on Regional Meteorology and Air Quality inSouthern California
Source: Copernicus journal article supplement (doi:10.5194/acp-2018-889), 2018-10-04
Supplement: Supplementary file 1 [file acp-2018-889-supplement.pdf]

# **Supplemental Information for “Effects of Urbanization on Regional Meteorology and Air Quality in Southern California”**

**Yun Li<sup>1</sup>, Jiachen Zhang<sup>1</sup>, David J. Sailor<sup>2</sup>, George A. Ban-Weiss<sup>1</sup>**

5   <sup>1</sup>Department of Civil and Environmental Engineering, University of Southern California, Los Angeles, 90007, USA

<sup>2</sup>School of Geographical Science and Urban Planning, Arizona State University, Tempe, 85281, USA

Correspondence to: George Ban-Weiss (banweiss@usc.edu)

## 10   **Contents of this file**

This file contents 8 figures and 1 table.

## S1. Evaluation of Simulated PM<sub>2.5</sub> Concentrations

In this section, the evaluation of simulated PM<sub>2.5</sub> concentrations using observations from both daily and hourly measurements is discussed. Hourly simulated and observed PM<sub>2.5</sub> concentrations are both averaged to daily mean PM<sub>2.5</sub> concentrations for this evaluation. Figure S1 shows the comparison between simulated and observed PM<sub>2.5</sub> concentrations using both daily and hourly measurements. Modelled values fit well with observations from daily measurement (red dots), and lie between 1:2 and 2:1 ratio lines. However, observations derived from hourly measurements are largely underestimated by the model (blue dots) for nearly half of the points. One possible reason is that hourly measurements tend to report higher PM<sub>2.5</sub> concentrations than daily measurement, as indicated by Figure S2.

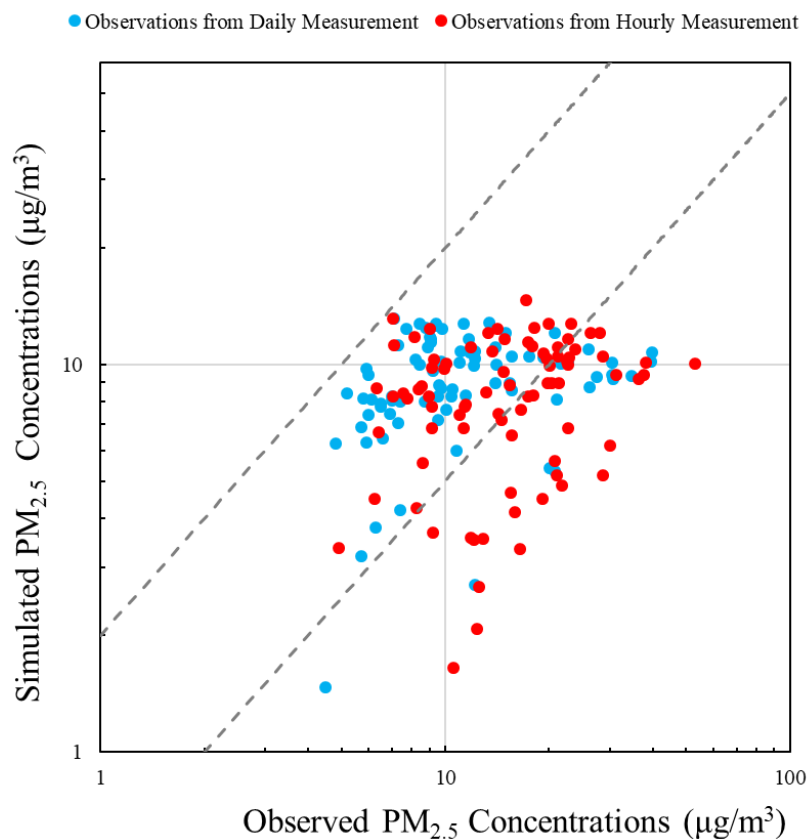

**Figure S1.** Comparison between modelled and observed PM<sub>2.5</sub> concentrations. Observational values from daily gravimetric measurements are shown as blue dots, while red dots show hourly observations using BAMs averaged to daily means. Two dashed grey lines indicate 1:2 and 2:1 ratios between modelled and observed values, respectively.

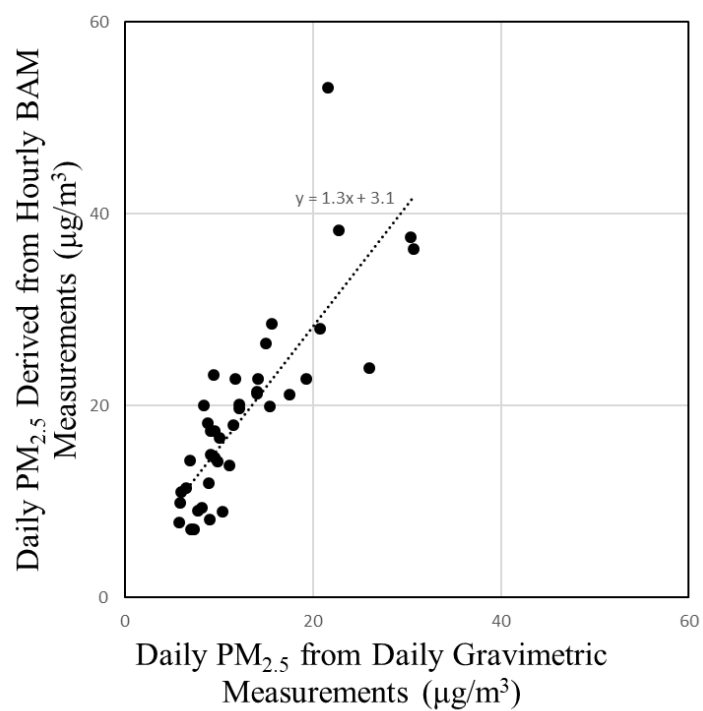

30 **Figure S2.** Comparison between collocated daily averaged PM<sub>2.5</sub> concentrations from daily gravimetric measurements versus hourly BAM measurements.

## S2. “Present-day No-irrigation” Scenario

In this section, we explain the effects of land surface changes from urbanization but excluding adding irrigation on air temperature. As shown in Figure S3, land surface property changes have led to urban temperature reduction from 8 PST to 15 PST, and increases during other times of day. The largest spatially averaged temperature reduction occurs at 10 PST ( $\Delta T = -0.63$  K), whereas the largest temperature increase occurs at 20 PST (+1.3 K). Spatially averaged urban temperature changes during morning, afternoon and at night are  $-0.37$  K,  $+0.05$  K and  $+0.72$  K, respectively.

During the morning, temperature reductions are simulated in most urban regions. However, the magnitude of the reductions is smaller than the difference between the Present-day and Nonurban scenarios (Figure S4a). During the afternoon, most parts of the west LA region and Riverside show increases in air temperature, while air temperature reductions occur in San Fernando Valley (Figure S4b). The pattern shown for inland regions differs from that shown by difference between the Present-day and Nonurban scenarios. During nighttime, temperature increases are larger in the inland regions of the basin than the coastal regions (Figure S5c), which is similar to the pattern shown by Present-day – Nonurban difference.

The aforementioned results indicate that land cover property changes from adopting impervious surfaces (e.g., shading effects within urban canopies, and increases in thermal inertia from the use of manmade materials) can cause air temperature reductions during the day, especially during the morning. However, the magnitude of air temperature reductions is much smaller without including the effects of adding irrigation through urbanization, indicating the important role of irrigation on reducing air temperature.

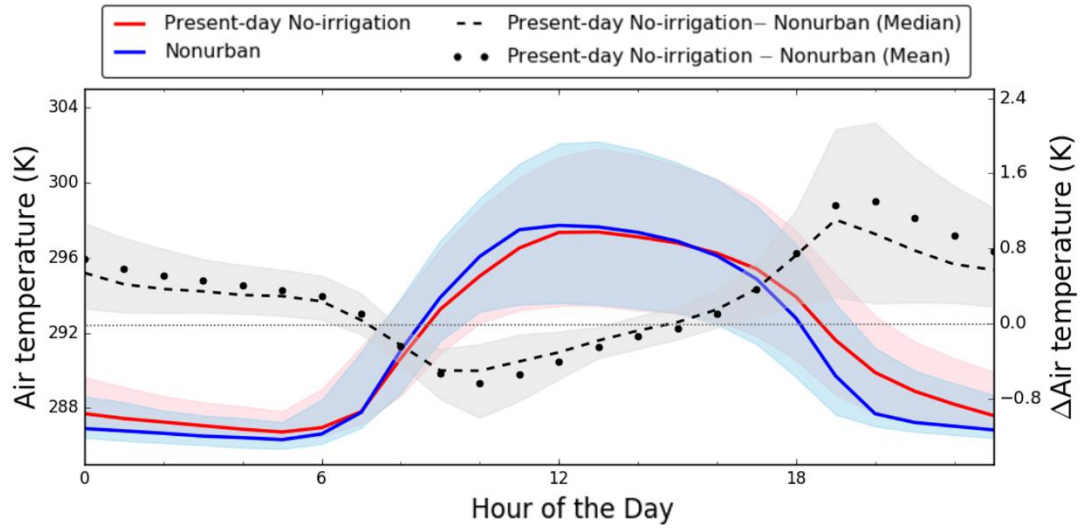

**Figure S3.** Diurnal cycles for present-day no-irrigation (red), nonurban (blue), and present-day no-irrigation – nonurban (black) for air temperature in the lowest atmospheric layer (K). The solid and dashed curves give the median values, while the shaded bands show 25<sup>th</sup> and 75<sup>th</sup> percentiles. Dots indicate mean values for differences between Present-day and nonurban. The horizontal dotted line in light grey shows  $\Delta = 0$  as an indicator of positive or negative change by land surface changes via urbanization without involving irrigation.

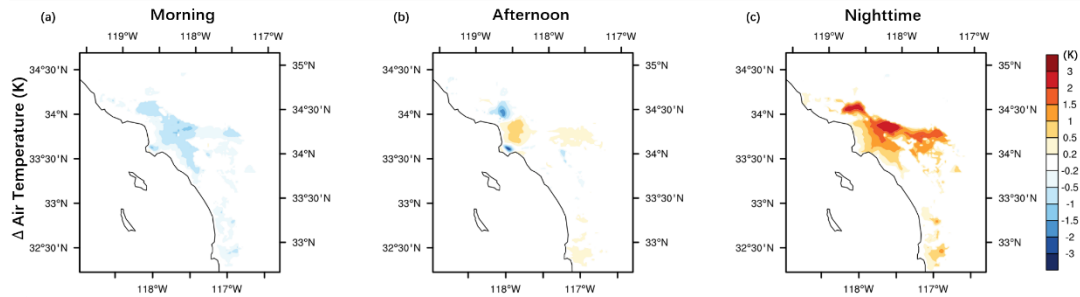

**Figure S4.** Spatial patterns of differences (Present-day No-irrigation – Nonurban) in temporally averaged values during morning, afternoon and nighttime for air temperature. Note that values are shown only for urban grid cells. Morning is defined as 7 PST to 12 PST, afternoon as 12 PST to 19 PST, and nighttime as 19 PST to 7 PST. Note that values are shown only for urban grid cells.

### S3. Other Supplemental Tables and Figures

**Table S1.** Conversion table from SAPRAC emission to RADM2 emissions. Species abbreviations in SAPRAC, RADM2, weight factor to apply, and species names are shown

| Species in SAPRAC | Species in RADM2 | Weight Fraction | Species Name                                            |
|-------------------|------------------|-----------------|---------------------------------------------------------|
| SO2               | E_SO2            | 1               | Sulfur dioxide                                          |
| NO                | E_NO             | 1               | Nitric Oxide                                            |
| NO2               | E_NO2            | 1               | Nitrogen Dioxide                                        |
| CO                | E_CO             | 1               | Carbon monoxide                                         |
| ALK1              | E_ETH            | 1               | Ethane kOH<500 /ppm/min                                 |
| ALK2              | E_HC3            | 1               | Alkane 500<kOH<2500 (exclude C3H8, C2H2, organic acids) |
| ALK3              | E_HC3            | 1.11            | Alkane 2500<kOH<5000 (exclude butanes)                  |
| MEOH              | E_HC3            | 0.4             | Methanol                                                |
| ACYE              | E_HC3            | 0.4             | Acetylene                                               |
| ETOH              | E_HC3            | 1.2             | Ethanol                                                 |
| ALK4              | E_HC5            | 0.97            | Alkane 5000<kOH<10000 (exclude pentanes)                |
| ALK5              | E_HC8            | 1               | Alkane kOH>10000                                        |
| OXYL              | E_XYL            | 1               | o-Xylene                                                |
| PXYL              | E_XYL            | 1               | p-Xylene                                                |
| MXYL              | E_XYL            | 1               | m-Xylene                                                |
| ARO2              | E_XYL            | 1               | Aromatic kOH>20000 /ppm/min (exclude xylenes)           |
| B124              | E_XYL            | 1               | 1,2,4-Trimethyl Benzene                                 |
| ETHE              | E_OL2            | 1               | Ethylene                                                |
| PRPE              | E_OLT            | 1               | Propene                                                 |
| OLE1              | E_OLT            | 1               | Alkenes kOH<20000 /ppm/min                              |
| MACR              | E_OLT            | 0.5             | Methacrolein                                            |

(Continue Table.S1)

|       |        |      |                                                              |
|-------|--------|------|--------------------------------------------------------------|
| MVK   | E_OLT  | 0.5  | Methyl Vinyl Ketone                                          |
| ACRO  | E_OLT  | 0.5  | Acrolein                                                     |
| IPRD  | E_OLT  | 0.5  | Lumped isoprene product species                              |
| OLE2  | E_OLI  | 1    | Alkenes kOH>20000 /ppm/min                                   |
| 13BDE | E_OLI  | 1    | 1,3-Butadienne                                               |
| BENZ  | E_TOL  | 1    | Benzene                                                      |
| ARO1  | E_TOL  | 1    | Aromatic kOH<20000 /ppm/min<br>(exclude benzene and toluene) |
| TOLU  | E_TOL  | 1    | Toluene                                                      |
| CRES  | E_CSL  | 1    | Cresols                                                      |
| HCHO  | E_HCHO | 1    | Formaldehyde                                                 |
| CCHO  | E_ALD  | 1    | Acetaldehyde                                                 |
| RCHO  | E_ALD  | 1    | Lumped C3+ aldehydes                                         |
| BALD  | E_ALD  | 1    | Aromatic aldehydes                                           |
| MACR  | E_ALD  | 0.5  | Methacrolein                                                 |
| GLY   | E_ALD  | 1    | Glyoxal                                                      |
| MGLY  | E_ALD  | 1    | Methyl Glyoxal                                               |
| BACL  | E_ALD  | 0.5  | Biacetyl                                                     |
| ACRO  | E_ALD  | 0.5  | Acrolein                                                     |
| IPRD  | E_ALD  | 0.5  | Lumped isoprene product species                              |
| ACET  | E_KET  | 0.33 | Acetone                                                      |
| PRD2  | E_KET  | 1.61 | Ketones kOH>7300 /ppm/min                                    |
| MVK   | E_KET  | 0.5  | Methyl Vinyl Ketone                                          |
| MEK   | E_KET  | 1.61 | Ketones kOH<7300 /ppm/min                                    |
| PACD  | E_ORA2 | 1    | Peroxyacetic and higher<br>peroxycarboxylic acids            |
| AACD  | E_ORA2 | 1    | Acetic and higher carboxylic acids                           |

(Continue Table.S1)

|        |                 |           |                                                                              |
|--------|-----------------|-----------|------------------------------------------------------------------------------|
| NH3    | E_NH3           | 1         | Ammonia                                                                      |
| CH4    | E_CH4           | 1         | Methane                                                                      |
| PAL    | E_PM25I/E_PM25J | 0.2/0.8   | Primary metal PM <sub>2.5</sub> – nuclei model and accumulation mode         |
| PCA    | E_PM25I/E_PM25J | 0.2/0.8   |                                                                              |
| PFE    | E_PM25I/E_PM25J | 0.2/0.8   |                                                                              |
| PK     | E_PM25I/E_PM25J | 0.2/0.8   |                                                                              |
| PMG    | E_PM25I/E_PM25J | 0.2/0.8   |                                                                              |
| PMN    | E_PM25I/E_PM25J | 0.2/0.8   |                                                                              |
| PMOTHR | E_PM25I/E_PM25J | 0.2/0.8   |                                                                              |
| PSI    | E_PM25I/E_PM25J | 0.2/0.8   |                                                                              |
| PTI    | E_PM25I/E_PM25J | 0.2/0.8   |                                                                              |
| PMC    | E_PM_10         | 1         | Unspeciated Primary PM <sub>10</sub> – nuclei model and accumulation mode    |
| PEC    | E_ECI/E_ECJ     | 0.2/0.8   | Elemental Carbon PM <sub>2.5</sub> – nuclei model and accumulation mode      |
| POC    | E_ORGI/E_ORGJ   | 0.2/0.8   | Organic PM <sub>2.5</sub> – nuclei model and accumulation mode               |
| PSO4   | E_SO4I/E_SO4J   | 0.2/0.8   | Sulfate PM <sub>2.5</sub> – nuclei model and accumulation mode               |
| SULF   | E_SO4I/E_SO4j   | 19.2/76.8 | Sulfate PM <sub>2.5</sub> from sulfates – nuclei model and accumulation mode |
| PNO3   | E_NO3I/E_NO3J   | 0.2/0.8   | Nitrate PM <sub>2.5</sub> – nuclei model and accumulation mode               |



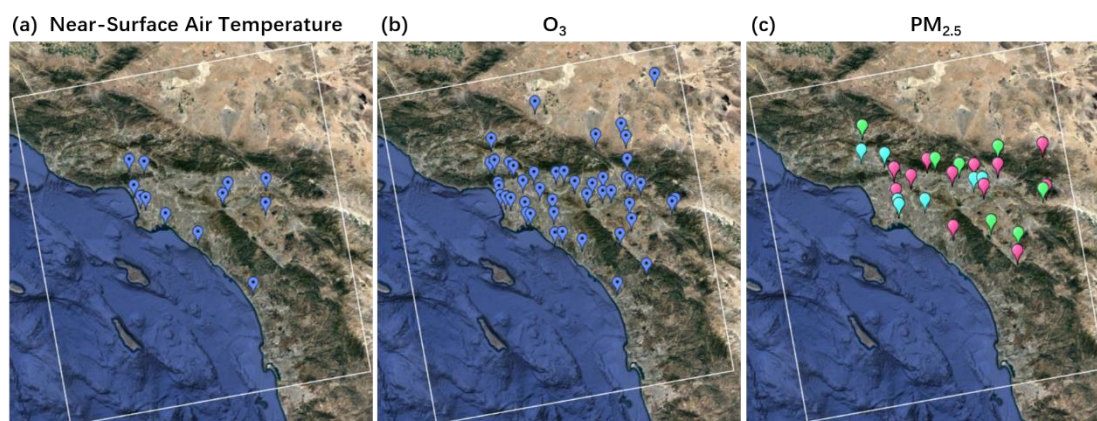

**Figure S5.** Locations of monitoring stations for (a) near-surface air temperature, (b) O<sub>3</sub> and (c) PM<sub>2.5</sub> concentration observations. Green, red and blue points in panel c show the locations for stations where only daily observations, only hourly observations, or both daily and hourly observations available, respectively. White solid lines in each panel give the boundary of the innermost (d03) model domain.

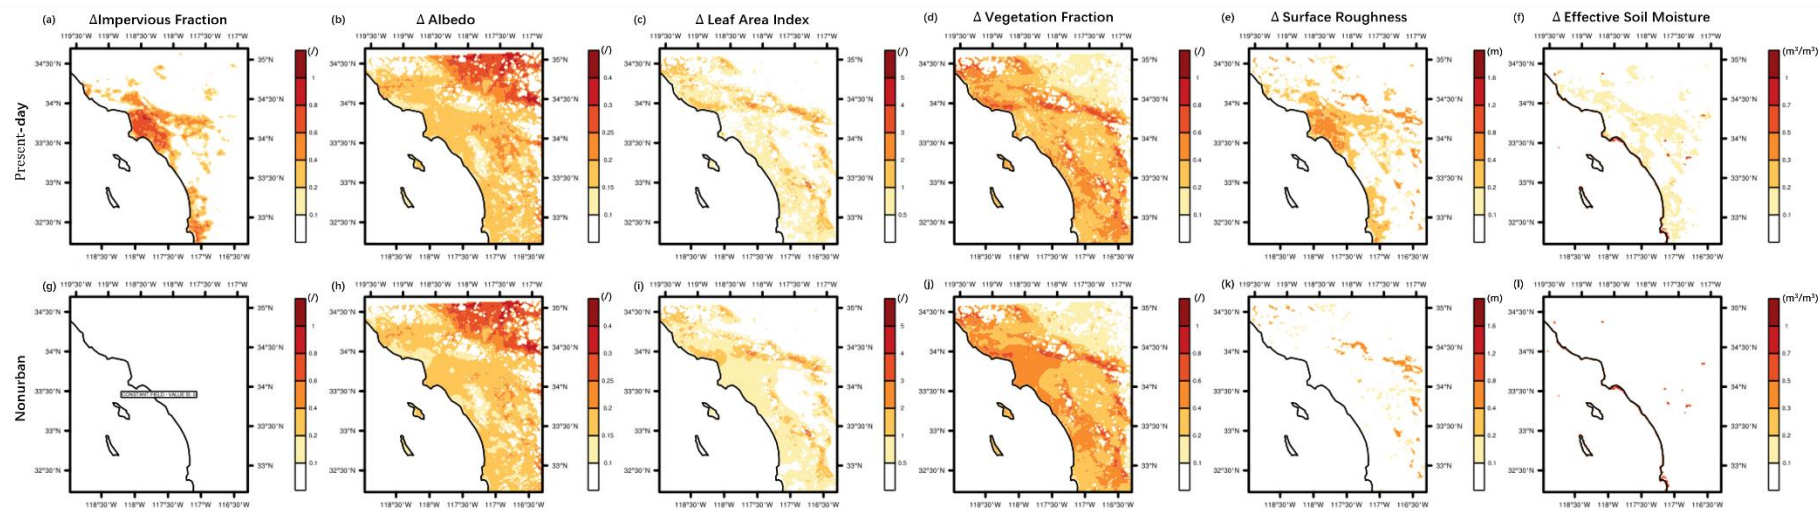

**Figure S6.** Land surface properties in the Present-day scenario and the Nonurban scenario.

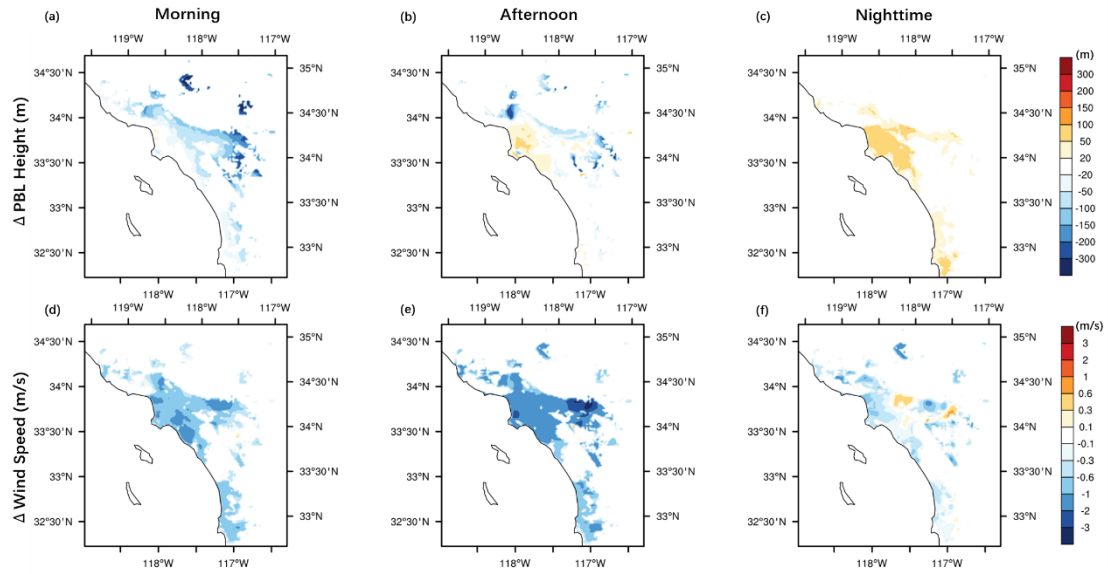

**Figure S7.** Spatial patterns of differences (Present-day – nonurban) in temporally averaged values during morning, afternoon and nighttime for (a,b,c) PBL heights, and (d,e,f) averaged wind speed under within PBL. Note that values are shown only for urban grid cells. Morning is defined as 7 PST to 12 PST, afternoon as 12 PST to 19 PST, and nighttime as 19 PST to 7 PST. Note that values are shown only for urban grid cells.

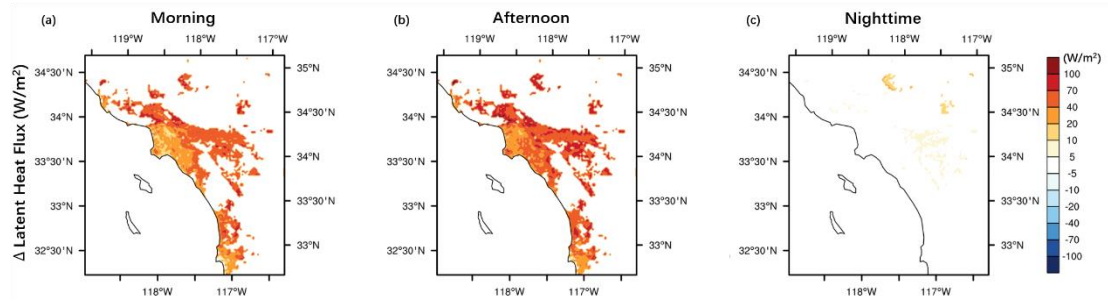

**Figure S8.** Spatial patterns of differences (Present-day – nonurban) in temporally averaged values during morning, afternoon and nighttime for latent heat fluxes. Note that values are shown only for urban grid cells. Morning is defined as 7 PST to 12 PST, afternoon as 12 PST to 19 PST, and nighttime as 19 PST to 7 PST. Note that values are shown only for urban grid cells.

## Reference

Please see the main paper.
